# Supplementary material for: Highly Sensitive Immunosensing of Carcinoembryonic Antigen Based on Gold Nanoparticles Dotted PB@PANI Core-Shell Nanocubes as a Signal Probe
Source: Hindawi journal article supplement (doi:10.1155/2023/7009624), 2023-04-07
Supplement: f1 [file 7009624.f1.pdf]

## Electronic Supplementary Material

### Highly sensitive immunosensing of carcinoembryonic antigen based on gold nanoparticles dotted PB@PANI core-shell nanocubes as a signal probe

Dexiang Feng,<sup>1,2</sup> Lingzhi Chen,<sup>2</sup> Ke Zhang,<sup>1,2</sup> Shuangshuang Zhu,<sup>1</sup> Meichen Ying,<sup>2</sup> Peng Jiang,<sup>2</sup> Menglan Fu,<sup>2</sup> Yan Wei,<sup>1,2</sup> Lihua Li<sup>2</sup>

<sup>1</sup>Department of Chemistry, Wannan Medical College, Wuhu, 241002, China

<sup>2</sup>Institute of Synthesis and Application of Medical Materials, Department of Pharmacy, Wannan Medical College, Wuhu, 241002, China

Correspondence should be addressed to Lihua Li; llh05530226@126.com and Yan Wei; yanwei@wnmc.edu.cn

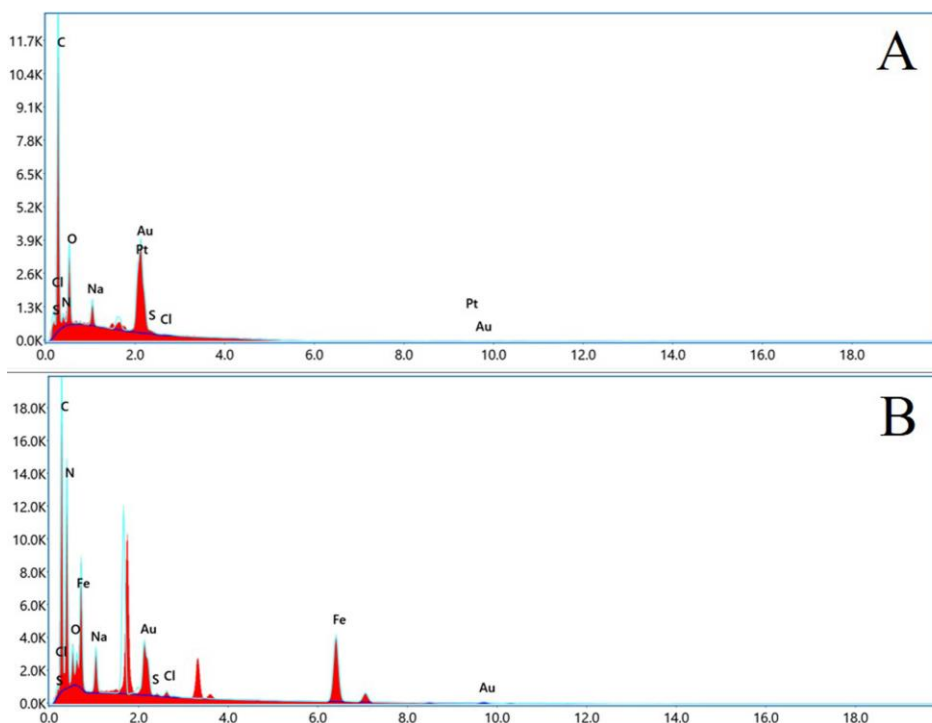

FIGURE. S1 EDX spectra of (A) AuPt NFs/L-Cys/GCE, (B) Au NPs-PB@PANI.
